# Supplementary material
Source: publisher figshare collection journal article supplement (https://gsapubs.figshare.com/ndownloader/files/22743668)
Supplement: Supplementary file 1 [file 22743668]

TABLE 1.  $^{87}\text{Sr}/^{86}\text{Sr}$  RATIOS AND AGES OF DSDP SITE 144A SAMPLES

| Sample, depth range<br>(cm) | $^{87}\text{Sr}/^{86}\text{Sr}$ | $\pm 2$ S.E. | Age<br>(Ma) | Max<br>(Ma) | Min<br>(Ma) |
|-----------------------------|---------------------------------|--------------|-------------|-------------|-------------|
| 144A 5-1, 144.5–145.5       | 0.707309                        | 13           | 88.84       | 89.82       | 88.39       |
| 144A 6-1, 104.5–106.5       | 0.707330                        | 11           | 88.37       | 89.01       | 87.84       |
| 144A 6-1, 141.5–142.5       | 0.707313                        | 11           | 88.74       | 90.10       | 88.22       |

*Note:* Ages were calculated from McArthur et al. (2001) relative to the Obradovich (1993) time scale. Samples (~20 individuals) of mixed species of planktics were dissolved in 100  $\mu\text{l}$  acetic acid, the Sr fraction was separated using 3M nitric acid on 80  $\mu\text{l}$  Sr-Spec columns, loaded onto Re filaments with Ta activator, and analyzed using a VG Sector 54 thermal ionization mass spectrometer. Minima and maxima from external error (NBS 987  $0.710243 \pm 20$ ;  $n = 10$ ) were obtained during this work (<100 ng Sr loaded identically to samples). Data corrected to 0.710250 for comparison to McArthur et al. (2001). Nannofossil stratigraphy discounts early Turonian ages. DSDP is Deep Sea Drilling Project.
